# Supplementary material for: Local Habitat Complexity and Its Effects on Herbivores and Predators in Urban Agroecosystems
Source: MDPI journal article supplement (doi:10.3390/insects15010041), 2024-01-07
Supplement: s1 [file s1]

## Article

# Local Habitat Complexity and Its Effects on Herbivores and Predators in Urban Agroecosystems

Azucena Lucatero<sup>1,\*</sup>, Shalene Jha<sup>2,3</sup>, and Stacy M. Philpott<sup>1</sup><sup>1</sup> Environmental Studies Department, University of California, Santa Cruz, CA 95064, USA<sup>2</sup> Integrative Biology Department, University of Texas at Austin, Austin, TX 78712, USA<sup>3</sup> Lady Bird Johnson Wildflower Center, University of Texas at Austin, Austin, TX 78739, USA

\* Correspondence: alucater@ucsc.edu

## Supplementary Material

**Table S1.** Pearson correlation matrix of vegetation complexity variables, gardener plot size, and predator abundance and richness in urban community garden plots ( $n = 64$ ) in the California central coast. Values in cells show correlation coefficients, and asterisks show significance.

|                    | Density | Diversity | Connectivity | Gardener plot size | Predator abundance | Predator richness |
|--------------------|---------|-----------|--------------|--------------------|--------------------|-------------------|
| Cover              | -       | 0.55*     | 0.44*        | 0.04               | -0.01              | 0.43*             |
| Diversity          | 0.55*   | -         | 0.10         | -0.01              | 0.04               | 0.07              |
| Connectivity       | 0.44*   | 0.1       | -            | -0.12              | 0.02               | 0.17              |
| Gardener plot size | 0.04    | -0.01     | -0.12        | -                  | 0                  | -0.12             |
| Predator abundance | -0.01   | 0.04      | 0.02         | 0                  | -                  | 0.3*              |
| Predator richness  | 0.43*   | 0.07      | 0.17         | -0.12              | 0.3*               | -                 |

\*  $p < 0.05$

**Table S2.** Natural enemy and herbivore morphospecies observed in visual surveys and pitfall traps deployed in urban community gardens in the California central coast.

| Trophic group | Order      | Family         | Morphospecies                         | Visual survey count | Pitfall trap count |
|---------------|------------|----------------|---------------------------------------|---------------------|--------------------|
| Predators     | Araneae    | Anyphaenidae   | <i>Anyphaena sp. 1</i>                | 3                   | 3                  |
|               |            | Clubionidae    | <i>Clubionidae sp. 1</i>              | 5                   | 0                  |
|               |            | Dysderidae     | <i>Dysdera crocata</i>                | 0                   | 4                  |
|               |            | Gnaphosidae    | <i>Scotophaeus blackwalli</i>         | 0                   | 4                  |
|               |            | Linyphiidae    | <i>Erigone sp. 1</i>                  | 3                   | 0                  |
|               |            |                | <i>Lyniphiidae sp. 1</i>              | 0                   | 1                  |
|               |            |                | <i>Microlinyphia sp. 1</i>            | 3                   | 1                  |
|               |            |                | <i>Nerienne dana</i>                  | 0                   | 2                  |
|               |            |                | <i>Nerienne digna</i>                 | 0                   | 1                  |
|               |            | Lycosidae      | <i>Arctosa sp. 1</i>                  | 0                   | 10                 |
|               |            |                | <i>Pardosa sierra</i>                 | 2                   | 0                  |
|               |            |                | <i>Pardosa sp. 1</i>                  | 1                   | 7                  |
|               |            | Salticidae     | <i>Saliticae sp. 1</i>                | 2                   | 0                  |
|               |            | Tetragnathidae | <i>Tetragnatha sp. 1</i>              | 3                   | 0                  |
|               |            | Theridiidae    | <i>Enoplognatha ovata</i>             | 1                   | 0                  |
|               |            |                | <i>Latrodectus hesperus</i>           | 2                   | 0                  |
|               |            |                | <i>Nerienne sp. 1</i>                 | 2                   | 0                  |
|               |            |                | <i>Parasteatoda/Cryptachaea sp. 1</i> | 4                   | 0                  |
|               |            |                | <i>Steatoda nobilis</i>               | 2                   | 0                  |
|               |            |                | <i>Steatoda sp. 1</i>                 | 2                   | 0                  |
|               |            |                | <i>Theridion sp.1</i>                 | 1                   | 0                  |
|               |            | Zoropsidae     | <i>Titiotus sp. 1</i>                 | 0                   | 2                  |
|               |            |                | <i>Titiotus sp. 2</i>                 | 0                   | 1                  |
|               | Opiliones  |                | <i>Opiliones UnkGenSp</i>             | 6                   | 0                  |
|               | Coleoptera | Carabidae      | <i>Carabidae sp. 1</i>                | 0                   | 2                  |
|               |            |                | <i>Laemustenus contemplanus</i>       | 0                   | 1                  |
|               |            |                | <i>Scaphinotus sp. 1</i>              | 0                   | 1                  |
|               |            | Staphylinidae  | <i>Staphylinidae sp. 1</i>            | 2                   | 25                 |
|               |            |                | <i>Sunius sp. 1</i>                   | 1                   | 0                  |
|               |            | Tenebrionidae  | <i>Coelocnemis californica</i>        | 0                   | 1                  |
|               | Diptera    | Dolichopodidae | <i>Dolichopidae sp. 1</i>             | 12                  | 0                  |
|               |            | Mecoptera      | <i>Mecoptera sp. 1</i>                | 1                   | 0                  |
|               |            | Syrphidae      | <i>Syrphidae sp. 1</i>                | 47                  | 0                  |
|               | Hemiptera  | Anthocoridae   | <i>Anthocoridae sp. 1</i>             | 1                   | 0                  |
|               |            | Geocoridae     | <i>Geocoris sp. 1</i>                 | 1                   | 6                  |
|               |            | Nabidae        | <i>Nabis sp. 1</i>                    | 1                   | 1                  |

|                |                             |               |                                  |     |     |
|----------------|-----------------------------|---------------|----------------------------------|-----|-----|
|                | Hymenop-<br>tera            | Formicidae    | <i>Cardiocondyla mauritanica</i> | 2   | 10  |
|                |                             |               | <i>Hypoponera opacior</i>        | 1   | 6   |
|                |                             |               | <i>Linepithema humile</i>        | 311 | 112 |
|                |                             |               | <i>Monomorium ergatogyna</i>     | 34  | 53  |
|                |                             |               | <i>Prenolepis imparis</i>        | 3   | 0   |
|                |                             |               | <i>Tetramorium sp. 1</i>         | 1   | 0   |
|                |                             | Mymaridae     | <i>Mymaridae sp. 1</i>           | 1   | 0   |
| Platygastridae | <i>Platygastridae sp. 1</i> | 1             | 0                                |     |     |
| TOTAL          |                             |               |                                  | 462 | 254 |
| Herbivores     | Coleoptera                  | Chrysomelidae | <i>Acalymma vittatum</i>         | 3   | NA  |
|                |                             |               | <i>Chrysomelidae UnkGenSp</i>    | 4   | NA  |
|                |                             |               | <i>Diabrotica sp. 1</i>          | 2   | NA  |
|                |                             |               | <i>Epitrix hirtipennis</i>       | 2   | NA  |
|                |                             | Ptinidae      | <i>Stegobium paniceum</i>        | 1   | NA  |
|                |                             | Scraptidae    | <i>Scraptidae UnkGenSp</i>       | 1   | NA  |
|                | Diptera                     | Sciarcidae    | <i>Sciarcidae UnkGenSp</i>       | 2   | NA  |
|                | Hemiptera                   | Aleyrodidae   | <i>Bemisia tabaci</i>            | 113 | NA  |
|                |                             | Aphididae     | <i>Acyrtosiphon pisum</i>        | 94  | NA  |
|                |                             |               | <i>Aphis fabae</i>               | 154 | NA  |
|                |                             |               | <i>Brevicoryne brassicae</i>     | 72  | NA  |
|                |                             |               | <i>Myzus persicae</i>            | 1   | NA  |
|                |                             | Cicadellidae  | <i>Empoasca sp. 1</i>            | 12  | NA  |
|                |                             |               | <i>Euscelidius sp. 1</i>         | 4   | NA  |
|                |                             | Miridae       | <i>Miridae UnkGenSp</i>          | 20  | NA  |
|                | Lepidoptera                 | Pieridae      | <i>Pieris rapae</i>              | 14  | NA  |
|                | Trombidi-<br>formes         | Tetranychidae | <i>Tetrachynus sp. 1</i>         | 3   | NA  |
| TOTAL          |                             |               |                                  | 502 | NA  |

**Table S3.** Model output from generalized linear mixed models (including site as a random effect) testing relationships between vegetation complexity metrics, herbivore and predator variables, and egg predation in urban community gardens in the California central coast. Predator sampling method is indicated by VS (visual survey) or PT (pitfall trap). We did not include these models in the main text because of model convergence and overfitting issues.

| Response variable   | Model type | No. models | Predictor variables | No. models with variable | Estimate | z or t* value | p-value |
|---------------------|------------|------------|---------------------|--------------------------|----------|---------------|---------|
| Herbivore abundance | Average    | 6          | Cover               | 2                        | -0.004   | -0.004        | 0.575   |
|                     |            |            | Diversity           | 3                        | -0.065   | 2.11          | 0.035   |
|                     |            |            | Connectivity        | 1                        | -0.85    | 0.074         | 0.9409  |
| Herbivore richness  | Average    | 4          | Cover               | 3                        | 0.006    | 1.01          | 0.314   |
|                     |            |            | Diversity           | 2                        | 0.001    | 0.002         | 0.999   |

|                         |         |   |              |   |        |       |        |
|-------------------------|---------|---|--------------|---|--------|-------|--------|
| Predator abundance (VS) | Average | 4 | Connectivity | 1 | -1.87  | 0.374 | 0.709  |
|                         |         |   | Cover        | 2 | 0.001  | 0.356 | 0.722  |
|                         |         |   | Diversity    | 3 | 0.005  | 0.371 | 0.711  |
|                         |         |   | Connectivity | 1 | 1.31   | 0.345 | 0.73   |
| Predator abundance (PT) | Average | 2 | Cover        | 2 | 0.021  | 2.54  | 0.011  |
|                         |         |   | Diversity    | 3 | -0.106 | 2.45  | 0.014  |
|                         |         |   | Connectivity | 1 | 1.15   | 0.154 | 0.878  |
| Predator richness (VS)  | Average | 4 | Cover        | 2 | 0.002  | 0.754 | 0.451  |
|                         |         |   | Diversity    | 3 | -0.027 | 1.71  | 0.088  |
|                         |         |   | Connectivity | 1 | 0.807  | 0.274 | 0.784  |
| Predator richness (PT)  | Average | 5 | Cover        | 2 | 0.009  | 1.02  | 0.309  |
|                         |         |   | Diversity    | 3 | -0.062 | 1.23  | 0.217  |
|                         |         |   | Connectivity | 1 | 4.16   | 0.658 | 0.51   |
| Ant abundance (VS)      | Average | 4 | Cover        | 2 | 0.001  | 0.346 | 0.73   |
|                         |         |   | Diversity    | 3 | 0.005  | 0.096 | 0.924  |
|                         |         |   | Connectivity | 1 | -1.54  | 199   | <0.001 |
| Ant abundance (PT)      | Average | 2 | Cover        | 2 | 0.02   | 2.24  | 0.025  |
|                         |         |   | Diversity    | 3 | -0.12  | 2.46  | 0.014  |
|                         |         |   | Connectivity | 1 | 9.6    | 1     | 0.316  |
| Ant richness (VS)       | Average | 5 | Cover        | 2 | 0.009  | 1.28  | 0.202  |
|                         |         |   | Diversity    | 3 | -0.029 | 0.685 | 0.493  |
|                         |         |   | Connectivity | 1 | 5.21   | 0.968 | 0.333  |
| Ant richness (PT)       | Average | 5 | Cover        | 2 | -0.001 | 0.236 | 0.813  |
|                         |         |   | Diversity    | 3 | -0.043 | 1.09  | 0.276  |
|                         |         |   | Connectivity | 1 | 4.85   | 0.867 | 0.386  |
| Spider abundance (VS)   | Average | 3 | Cover        | 2 | 0.02   | 1.84  | 0.066  |
|                         |         |   | Diversity    | 3 | -0.017 | 0.277 | 0.781  |
|                         |         |   | Connectivity | 1 | -1.59  | 0.153 | 0.879  |
| Spider abundance (PT)   | Average | 3 | Cover        | 2 | 0.037  | 2.31  | 0.021  |
|                         |         |   | Diversity    | 3 | -0.162 | 1.71  | 0.087  |
|                         |         |   | Connectivity | 1 | -6.01  | 0.361 | 0.718  |
| Spider richness (VS)    | Average | 3 | Cover        | 2 | 0.024  | 8.17  | <0.001 |
|                         |         |   | Diversity    | 3 | 0.003  | 0.73  | 0.465  |
|                         |         |   | Connectivity | 1 | -4.81  | 1045  | <0.001 |
| Spider richness (PT)    | Average | 4 | Cover        | 2 | 0.025  | 1.61  | 0.107  |
|                         |         |   | Diversity    | 3 | -0.146 | 1.6   | 0.109  |
|                         |         |   | Connectivity | 1 | -8.2   | 0.496 | 0.62   |
| Egg predation           | Average | 3 | Connectivity | 2 | -0.99  | 0.618 | 0.536  |
|                         |         |   | Predator     | 1 | 0.009  | 3.18  | 0.001  |

|  |           |
|--|-----------|
|  | abundance |
|--|-----------|
